# Supplementary material for: Human hepatic stem cells transplanted into a fulminant hepatic failure Alb-TRECK/SCID mouse model exhibit liver reconstitution and drug metabolism capabilities
Source: PubMed Central journal article supplement (PMC4414454; doi:10.1186/s13287-015-0038-9), 2015-03-26
Supplement: 13287_2015_38_MOESM1_ESM.pdf [file 13287_2015_38_MOESM1_ESM.pdf]

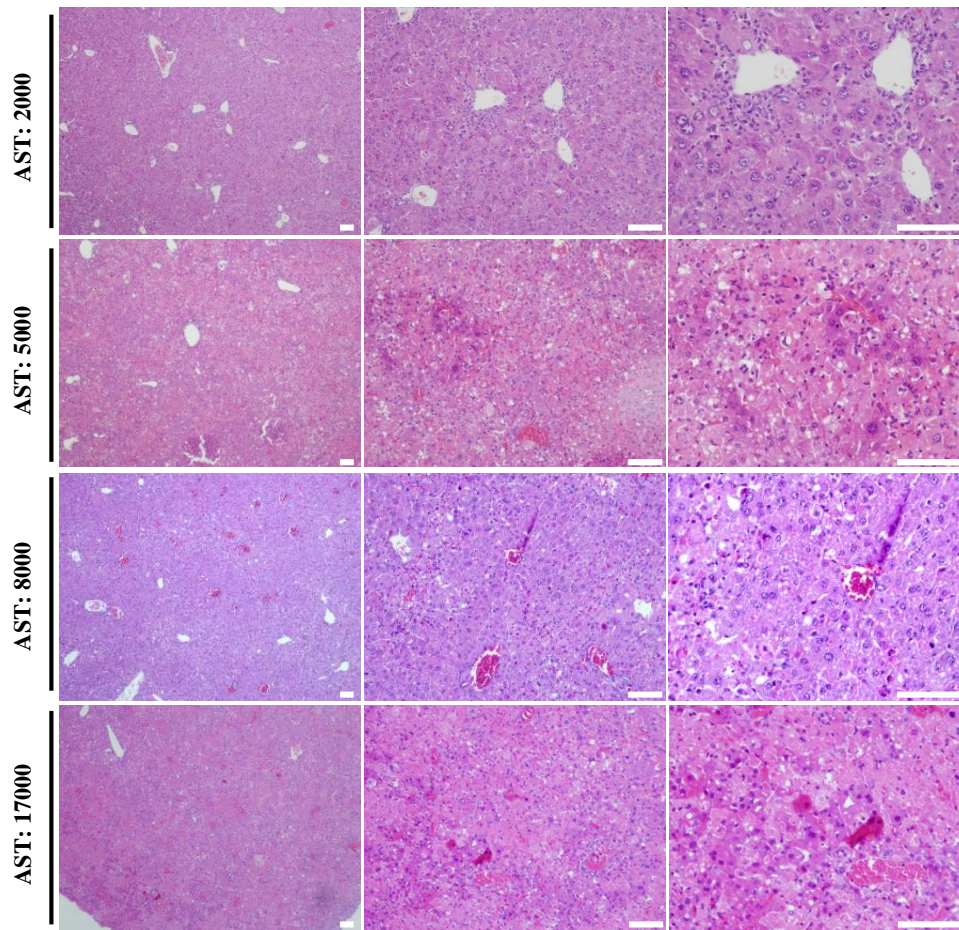

**Figure S1. Histological analysis for the relationship between serum aspartate transaminase activity and the degree of liver damage.**

At 48 hours after diphtheria toxin injection, serum aspartate transaminase (AST) activity was determined and Alb-TRECK/SCID mouse livers were sampled and stained with hematoxylin and eosin. Scale bars = 100 μm.

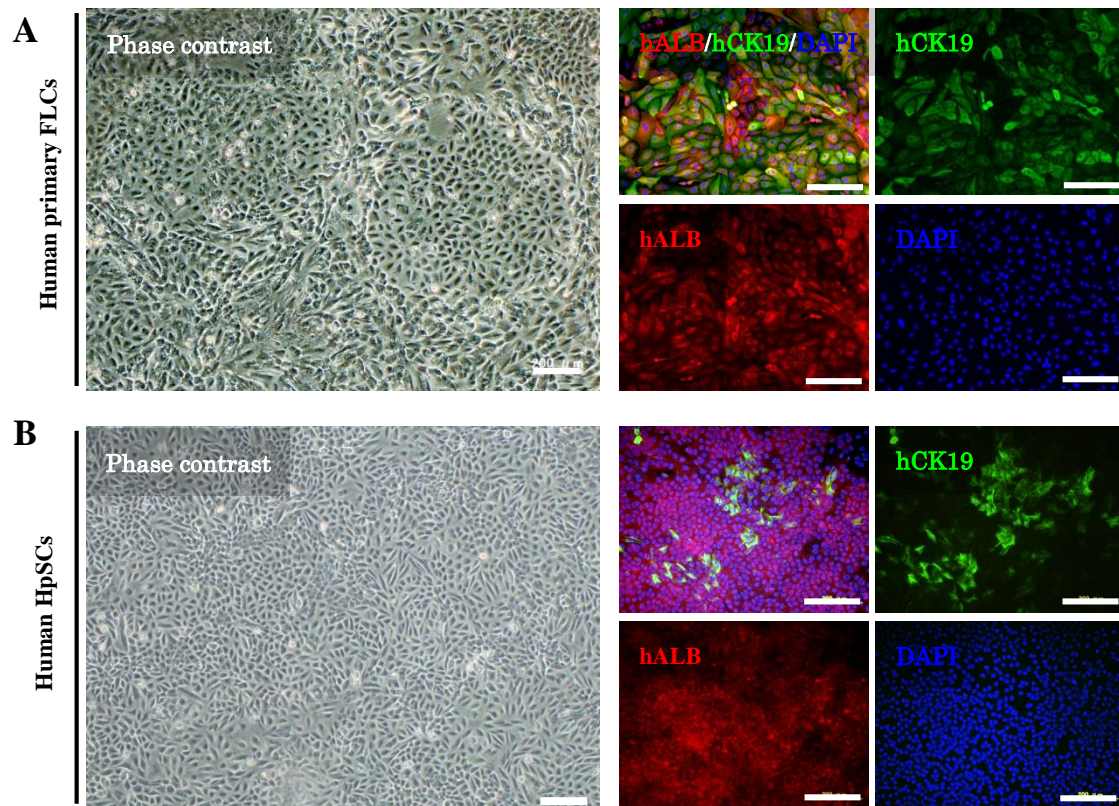

**Figure S2. Characteristics of human primary fetal liver cells and human hepatic stem cells in vitro.**

Morphologies (left panels) and immunocytochemistry results (right two panels) of human primary fetal liver cells (FLCs; A) and human hepatic stem cells (HpSCs; B) stained for human albumin (red) and CK19 (green). Cells were passaged 8 times. Nuclei were counterstained with 4',6-diamidino-2-phenylindole (blue). Scale bars = 200  $\mu\text{m}$ .

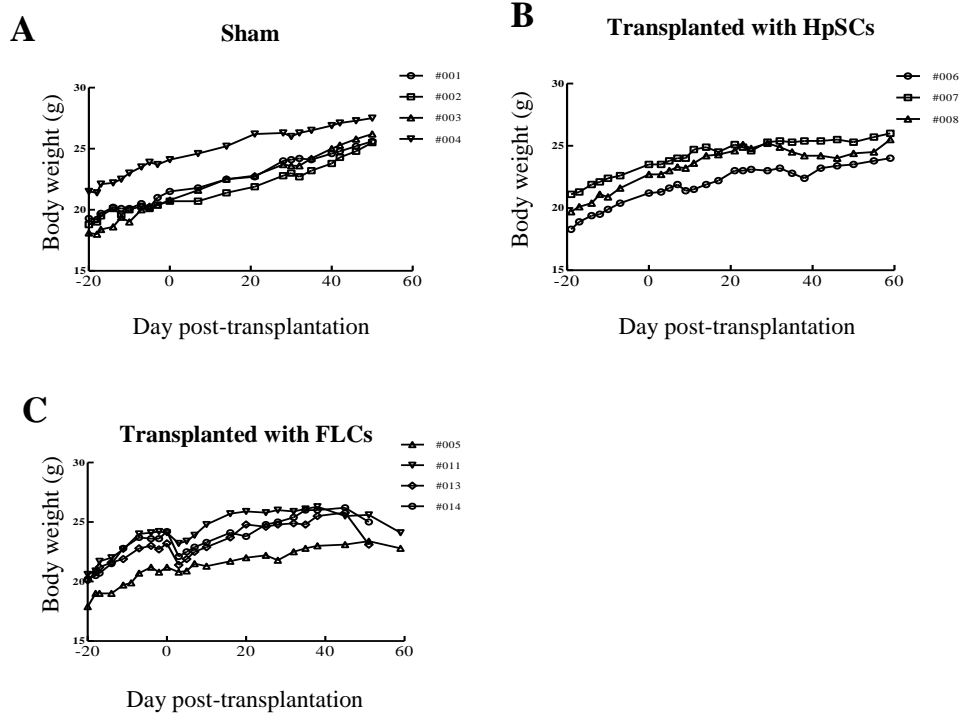

**Figure S3. Body weight changes for Alb-TRECK/SCID mice after human primary fetal liver cells and human hepatic stem cells transplantation.**

A-C. Mouse body weights were monitored for 20 days before and for 60 days after cell transplantation. Day 0: time point for cell transplantation. #001-#014: IDs of transplanted mice. Sham: mice transplanted with saline.

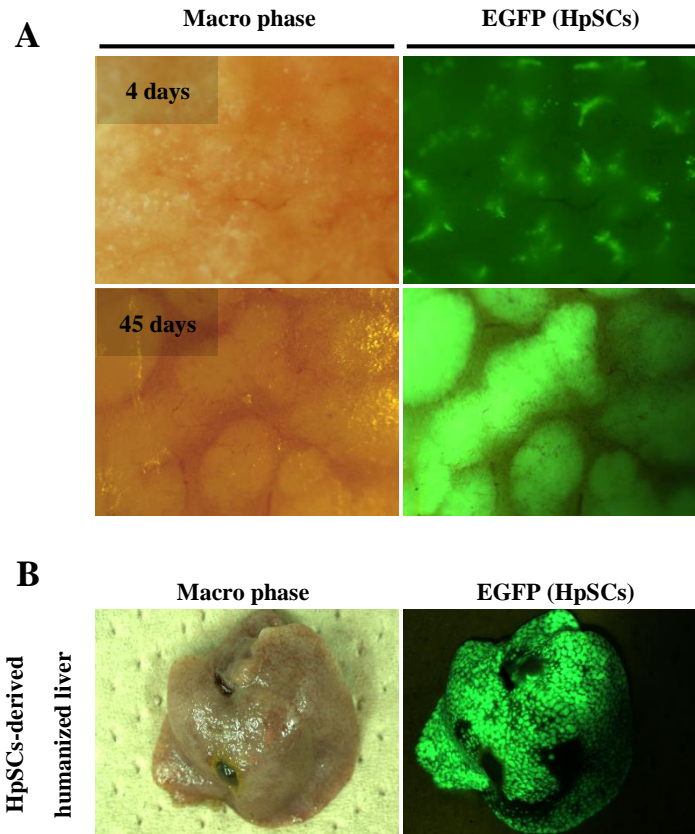

**Figure S4. Macroscopic analysis of humanized livers derived from human hepatic stem cells labeled with green fluorescent protein.**

A. High-magnification images of liver structure after transplantation with human hepatic stem cells (HpSCs) for 4 days and 45 days. Human hepatic stem cells (HpSCs) were labeled with green fluorescent protein (EGFP) using lentivirus. B. Macroscopic image of a whole humanized liver at 45 days after transplantation with human EGFP-HpSCs. EGFP positive cells in right panels are human hepatic stem cells (HpSCs) derived cells.

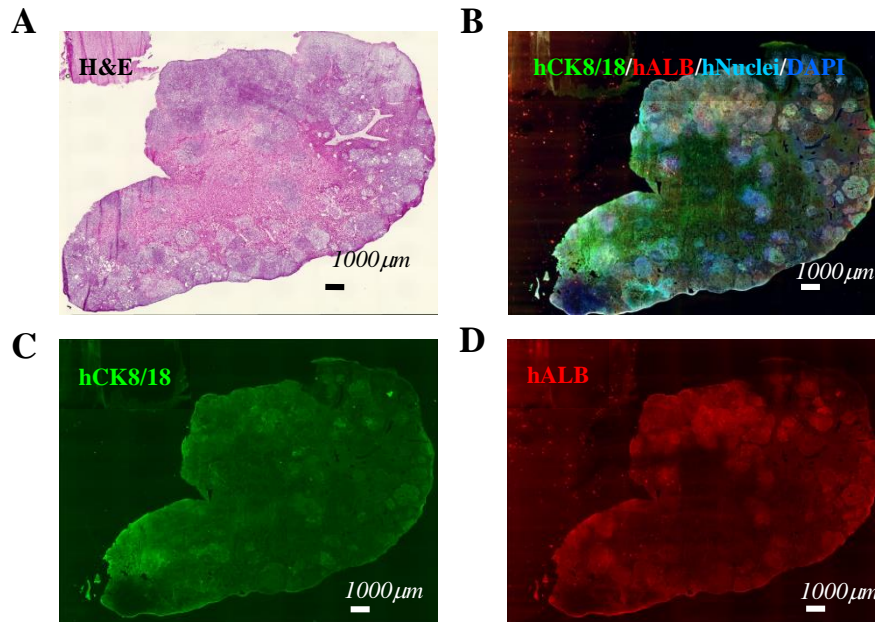

**Figure S5. Human hepatic stem cell-derived multiple clusters in Alb-TRECK/SCID mouse with humanized livers.**

Multiple large clusters derived from human hepatic stem cells in liver lobes at 6 weeks after transplantation were identified by hematoxylin and eosin staining (A) and immunohistochemistry analysis (B-D) for human CK8/18 (green), human nuclei (aqua blue), and human albumin (red). Nuclei were counterstained with 4',6-diamidino-2-phenylindole (blue). Scale bars = 1000 μm.

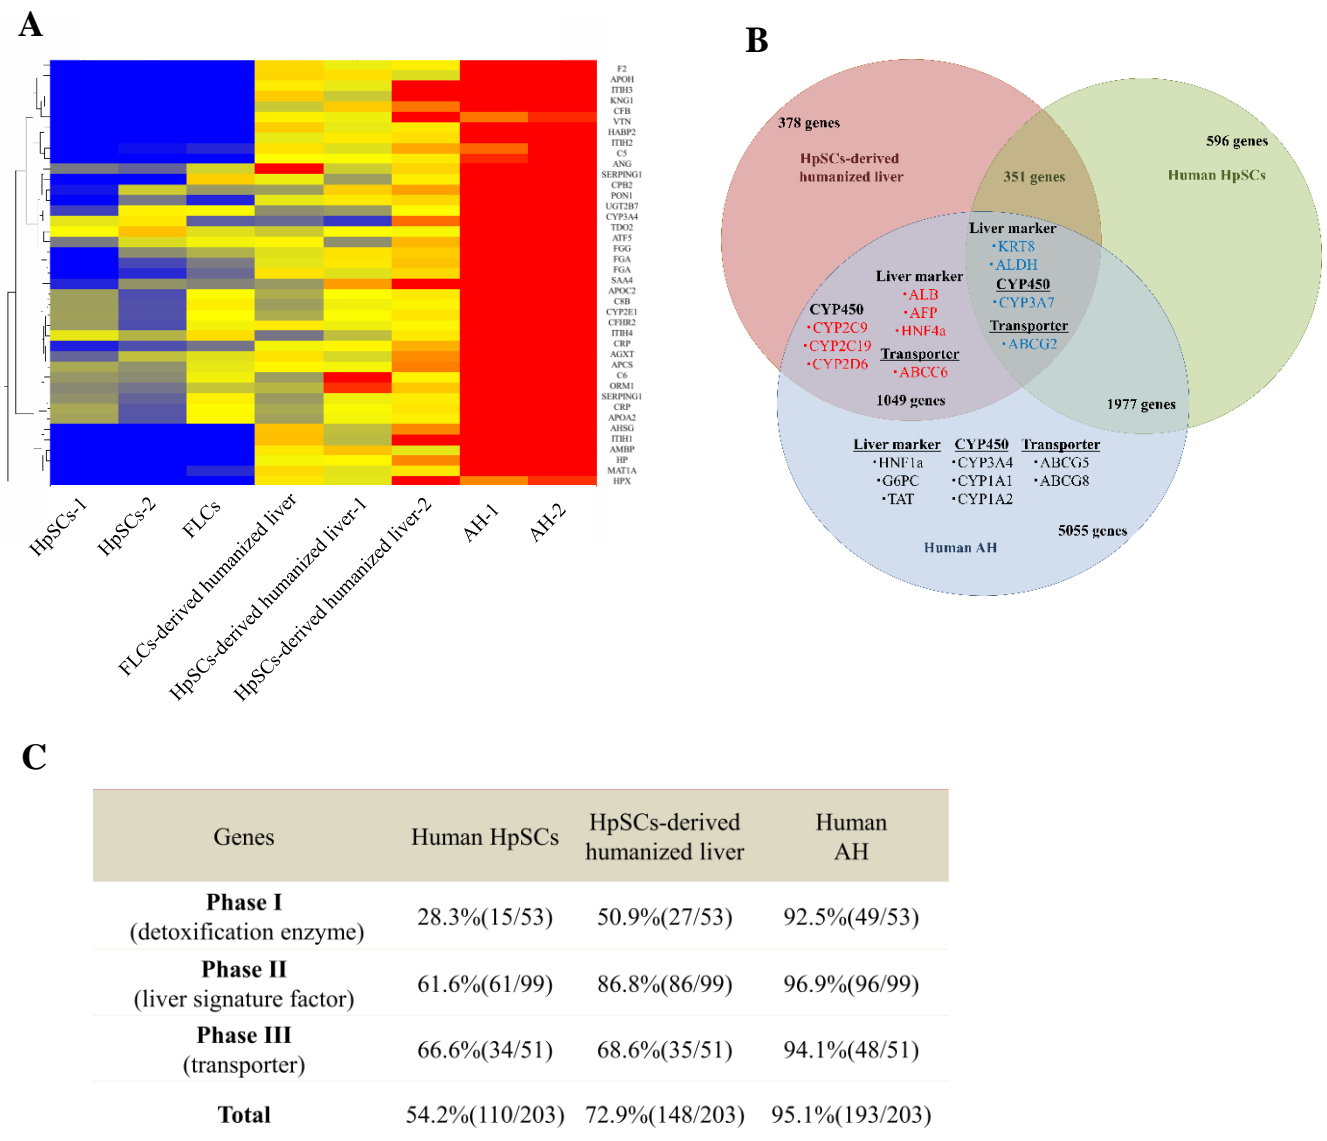

**Figure S6. Liver specific genes and drug metabolism genes' expression in humanized livers.**

A. Heat map for 38 liver specific signature genes, shown separately for independent experiments to analyze human primary fetal liver cells (FLCs) and hepatic stem cells

(HpSCs) before and at 8 weeks after cell transplantation. B. Venn diagram for the selective display of genes with high or lower expression in humanized livers derived from human HpSCs (2-fold changes): human HpSCs-derived humanized liver at 8 weeks after cell transplantation (upper left diagram); human AH (lower diagram); human HpSCs (upper right diagram). Overlapping regions show the gene numbers and representative gene names that were common in the different comparisons. (see Additional file 2 for the gene list in each comparison). C. Percentages of human drug metabolic phase I, II, and III genes that were positively detected in human HpSCs-derived humanized liver at 8 weeks after cell transplantation, human HpSCs, and human AHs. The numbers of genes detected and total gene numbers for each phase are indicated in brackets. (see Additional file 3 for the gene list). Human adult hepatocytes were used as a positive control.
